# Supplementary material for: Consensus guidelines for eligibility assessment of pathogenic variants to antisense oligonucleotide treatments
Source: bioRxiv or medRxiv preprint supplement (doi:10.1101/2024.09.27.24314122), 2024-09-28
Supplement: Supplementary file [file media-2.pdf]

## Supplementary File 2

Table with test variants for piloting rounds. The table indicates which test variants were provided to the assessors for the 3 piloting rounds. This purposely includes variants with incorrect descriptions.

| Piloting Round | Transcript        | Gene           | Variant        |
|----------------|-------------------|----------------|----------------|
| 1              | NM_025152.3       | <i>NUBPL</i>   | c.815-27T>C    |
| 1              | NM_000350.3       | <i>ABCA4</i>   | c.769-784C>T   |
| 1*             | NM_024312.5       | <i>GNPTAB</i>  | c.3505_3504del |
| 2              | NM_020366.3       | <i>RPGRIP1</i> | c.1468-128T>G  |
| 2              | NM_000329.3       | <i>RPE65</i>   | c.1430A>G      |
| 2              | NM_001086521.2    | <i>NDUFAF8</i> | c.195+271C>T   |
| 2              | NM_003907.3       | <i>EIF2B5</i>  | c.1156+13G>A   |
| 2              | NM_206933.4       | <i>USH2A</i>   | c.2692C>T      |
| 2              | NM_000391.4       | <i>TPP1</i>    | c.225A>G       |
| 2              | NM_024298.5       | <i>MBOAT7</i>  | c.758_778del   |
| 2              | NM_018075.5       | <i>ANO10</i>   | c.289del       |
| 2*             | NM_024312.5       | <i>GNPTAB</i>  | c.3503_3504del |
| 2              | NM_003650.4       | <i>CST7</i>    | c.2035-946G>A  |
| 2              | NM_000303.3       | <i>PMM2</i>    | c.640-15479C>T |
| 2              | NM_000202.8       | <i>IDS</i>     | c.1122C>T      |
| 3              | NM_018075.5       | <i>ANO10</i>   | c.1025G>A      |
| 3              | NM_001127222.2    | <i>CACNA1A</i> | c.4174G>A      |
| 3              | NM_024312.5       | <i>GNPTAB</i>  | c.3488del      |
| 3              | NM_133433.4       | <i>NIPBL</i>   | c.5329-15A>G   |
| 3              | ENST00000361390.2 | <i>MT-ND1</i>  | m.4142G>T      |
| 3              | NM_014727.3       | <i>KMT2B</i>   | c.8079delC     |
| 3              | NM_024312.5       | <i>GNPTAB</i>  | c.1123C>T      |
| 3              | NM_005859.5       | <i>PURA</i>    | c.159dup       |
| 3              | NM_001167623.2    | <i>CACNA1C</i> | c.1216G>A      |
| 3              | NM_000561.4       | <i>HEXB</i>    | c.1509-26G>A   |
| 3              | ENST00000435607.3 | <i>SCN4A</i>   | c.3891C>A      |
| 3              | NM_001244008.2    | <i>KIF1A</i>   | c.914C>T       |
| 3              | NM_000492.4       | <i>CFTR</i>    | c.2989-313A>T  |
| 3              | NM_001194.4       | <i>HCN2</i>    | c.736G>A       |
| 3              | NM_000170.3       | <i>GLDC</i>    | c.538C>T       |

\*Indicates duplicate variants assessed in multiple rounds
